# Supplementary material for: The Protective Effect of the Total Flavonoids of Abelmoschus esculentus L. Flowers on Transient Cerebral Ischemia-Reperfusion Injury Is due to Activation of the Nrf2-ARE Pathway
Source: Oxid Med Cell Longev. 2018 Aug 5;2018:8987173. doi: 10.1155/2018/8987173 (PMC6098902; doi:10.1155/2018/8987173)
Supplement: Supplementary Materials — The corresponding experimental data associated with this article can be seen from the supplementary materials' files. [file 8987173.f1.xlsx]

## Sheet: Sheet1
	Supplementary data:
	Table S1. Neurologic function score of 10 mice
	Score Group	1	2	3	4	5	6	7	8	9	10	AVERAGE	SD
	Normal	0	0	0	0	0	0	0	0	0	0	0	0
	Model	2	3	4	3	2	4	3	2	3	2	2.8	0.788811
	AFE300mg/kg	1	2	1	1	2	1	1	2	0	1	1.2	0.632456
	AFE150mg/kg	1	1	1	2	2	1	2	2	1	2	1.5	0.527046
	AFE75mg/kg	2	1	2	3	2	1	3	2	2	1	1.9	0.737865
	Table S2. infarct areas in brain tissue of 3 mice
	infarct areas Group	1	2	3	AVERAGE	SD
	Normal	1.36	1.02	0.83	1.07	0.268514
	Model	36.63	38.81	38.95	38.13	1.30092
	AFE300mg/kg	5.43	7.32	5.89	6.21	0.985613
	AFE150mg/kg	16.38	16.73	18.94	17.35	1.38806
	AFE75mg/kg	33.68	34.79	34.61	34.36	0.595735
	Table S3. NO, SOD and MDA contents in brain tissue of 4 mice
	NO Group	1	2	3	4	AVERAGE	SD
	Normal	1.68	1.7	1.65	1.61	1.66	0.033912
	Model	3.34	3.51	3.17	3.19	3.3	0.136634
	AFE300mg/kg	0.94	1.01	1.03	1.04	1.01	0.039051
	AFE150mg/kg	1.52	1.64	1.58	1.6	1.59	0.043301
	AFE75mg/kg	2.29	2.41	1.99	2.06	2.19	0.169761
	SOD Group	1	2	3	4	AVERAGE	SD
	Normal	20.97	26.51	21.46	22.33	22.82	2.18679
	Model	9.71	8.23	8.57	10.26	9.19	0.824814
	AFE300mg/kg	23.09	24.15	28.43	26.46	25.53	2.06959
	AFE150mg/kg	23.08	21.66	22.37	23.42	22.63	0.677325
	AFE75mg/kg	17.69	16.16	15.88	14.89	16.16	1.004
	MDA Group	1	2	3	4	AVERAGE	SD
	Normal	1.4	1.33	1.31	1.36	1.35	0.033912
	Model	2.01	2.15	2.08	1.97	2.05	0.068693
	AFE300mg/kg	1.36	1.14	0.93	1.23	1.17	0.156605
	AFE150mg/kg	1.01	1.37	1.88	1.13	1.35	0.333645
	AFE75mg/kg	0.98	1.73	1.16	2.7	1.64	0.670387
	Table S4: WB experimental data in each group brain tissue homogenate of 4 mice (AVERAGE=gray value of sample/gray value of β-Actin)
	Nrf2 Group	1	2	3	4	β-Actin	AVERAGE	SD
	Normal	110396	107283	116405	110109	205996	0.540135	0.0226689
	Model	120658	121039	144410	150041	205996	0.672327	0.0747689
	AFE300mg/kg	198772	212133	210742	210075	205956	1.02441	0.0299363
	AFE150mg/kg	186095	180456	177177	185028	205996	0.878109	0.0201017
	AFE75mg/kg	135719	155720	160721	155722	205992	0.764047	0.0538261
	NQO1 Group	1	2	3	4	β-Actin	AVERAGE	SD
	Normal	131210	129208	146177	116081	205996	0.634328	0.0598324
	Model	140262	147338	143025	139627	205996	0.692067	0.0170319
	AFE300mg/kg	219518	246116	233336	229755	205956	1.12733	0.0533178
	AFE150mg/kg	236521	226850	200922	178732	205996	1.02311	0.126747
	AFE75mg/kg	206119	181243	165880	175315	205992	0.884205	0.0834629
	HO-1 Group	1	2	3	4	β-Actin	AVERAGE	SD
	Normal	81408	70890	66505	81717	205996	0.364716	0.0370946
	Model	143852	170853	157854	138835	205996	0.741997	0.070154
	AFE300mg/kg	228003	221904	226088	212106	205956	1.07802	0.0344067
	AFE150mg/kg	181796	179762	188589	165199	205996	0.868155	0.0477869
	AFE75mg/kg	165023	143011	166086	179006	205992	0.792659	0.0724968
